# Supplementary material for: Well-defined podophyllotoxin polyprodrug brushes: preparation via RAFT polymerization and evaluation as drug carriers
Source: Royal Society of Chemistry journal article supplement (doi:10.1039/c6py01883a), 2016-12-20
Supplement: c6py01883a1.pdf [file c6py01883a1.pdf]

## Supplementary Materials

### Well-defined Podophyllotoxin Polyprodrug Brush: Preparation via RAFT Polymerization and Evaluation as Drug Carrier

Yifei Guo,<sup>†</sup> Chunying Hao,<sup>†</sup> Xiangkang Wang,<sup>‡</sup> Yanna Zhao,<sup>†</sup> Meihua Han,<sup>†</sup> Mincan Wang,<sup>\*,‡</sup> Xiangtao Wang<sup>\*,†</sup>

<sup>†</sup> Institute of Medicinal Plant Development, Chinese Academy of Medical Sciences & Peking Union Medical College, No. 151, Malianwa North Road, Haidian District, Beijing 100193, China

<sup>‡</sup> The College of Chemistry and Molecular Engineering, Zhengzhou University, No. 75 Daxue Road, Zhengzhou, Henan 450052, P. R. China

E-mail: xtaowang@163.com; Fax: +86 10 57833266; Tel: +86 10 57833264

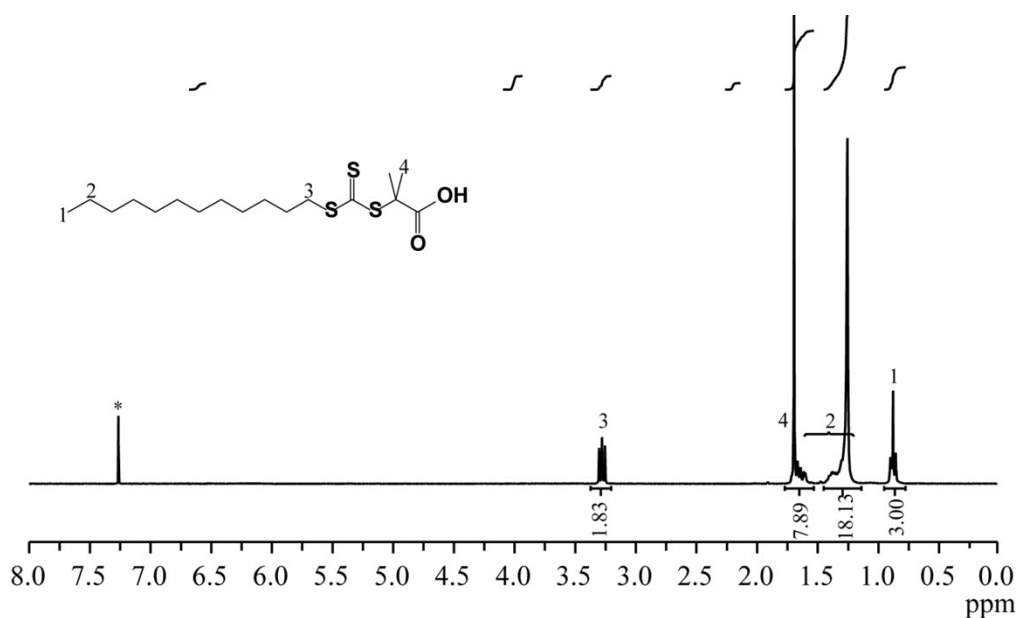

**Figure S1.** <sup>1</sup>H NMR spectrum of chain transfer agent CTA.

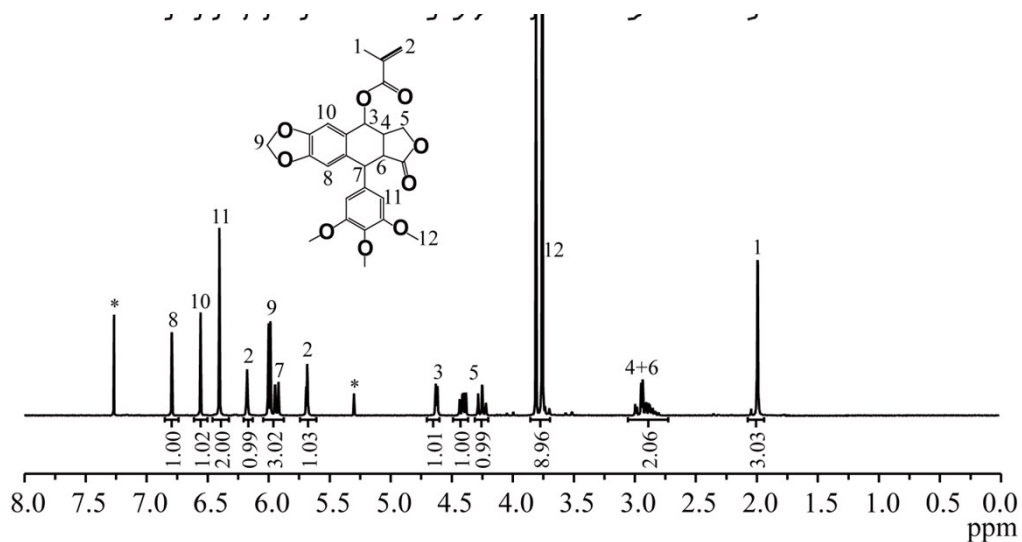

**Figure S2.**  $^1\text{H}$  NMR spectrum of podophyllotoxin methacrylate monomer.

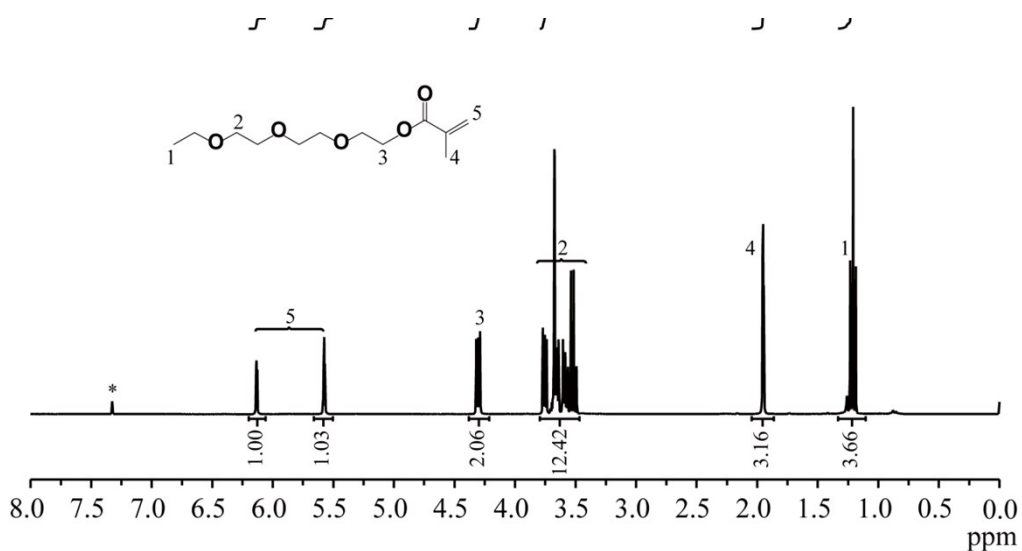

**Figure S3.**  $^1\text{H}$  NMR spectrum of triethylene glycol methacrylate monomer.

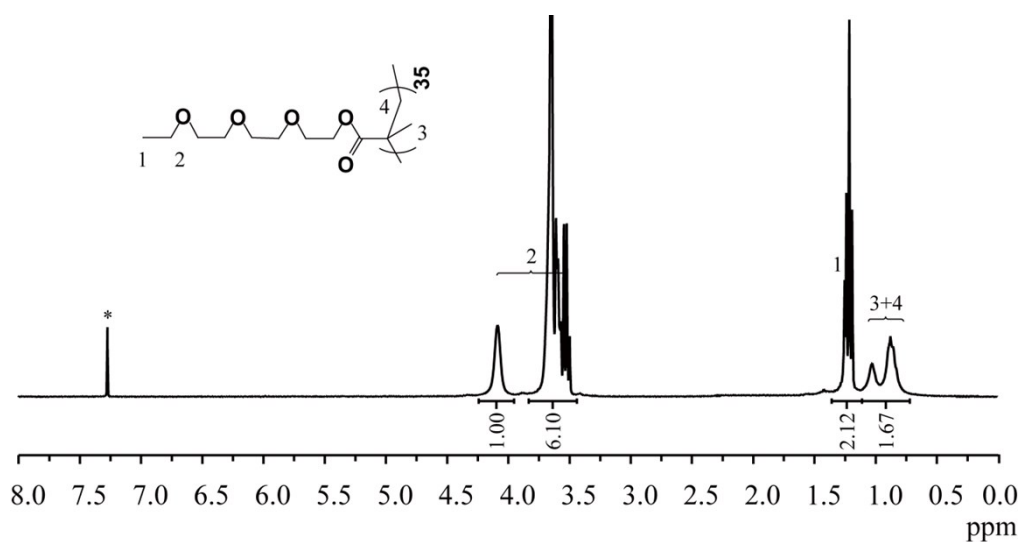

**Figure S4.**  $^1\text{H}$  NMR spectrum of poly(triethylene glycol methacrylate).

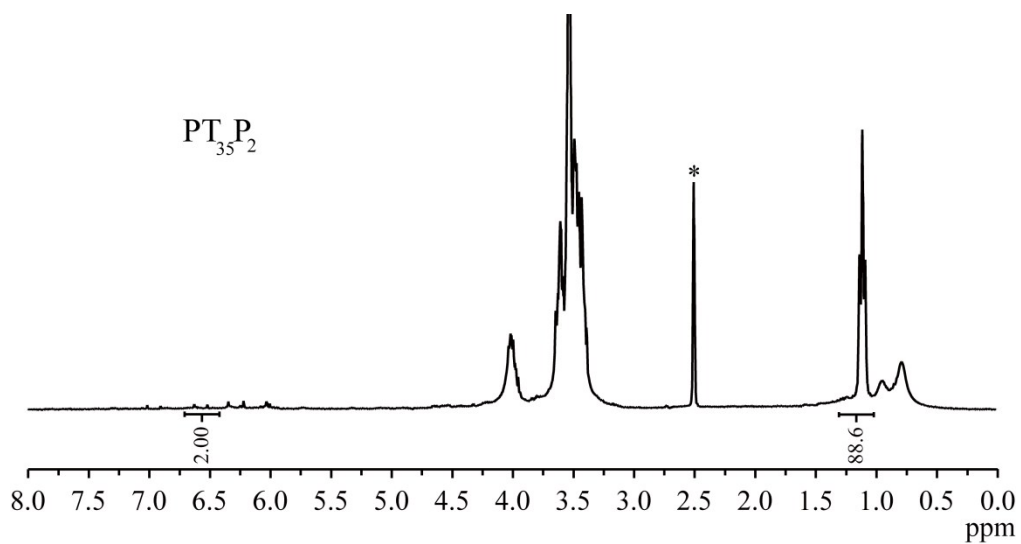

**Figure S5.**  $^1\text{H}$  NMR spectrum of polyprodrug brush  $\text{PT}_{35}\text{P}_2$ .

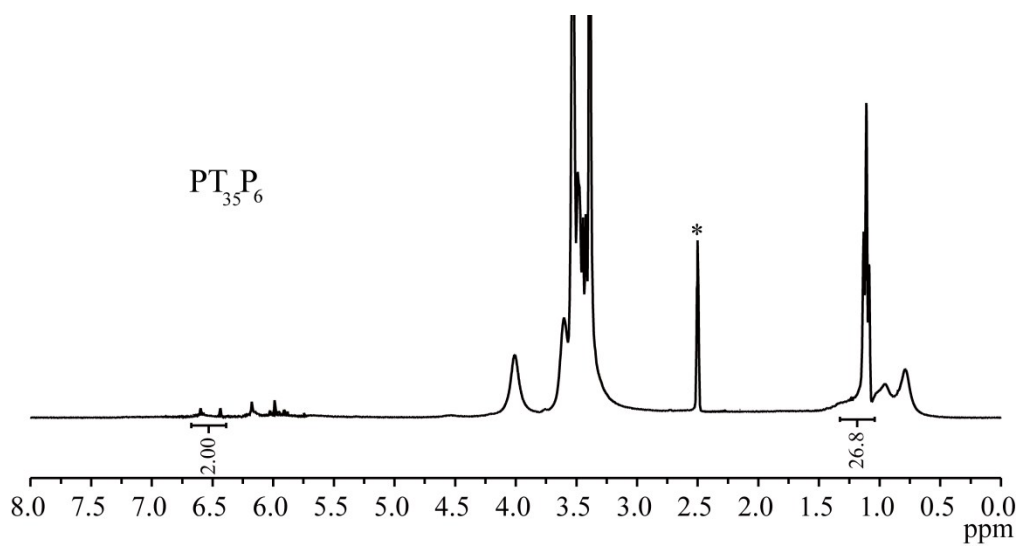

**Figure S6.**  $^1\text{H}$  NMR spectrum of polyprodrug brush  $\text{PT}_{35}\text{P}_6$ .

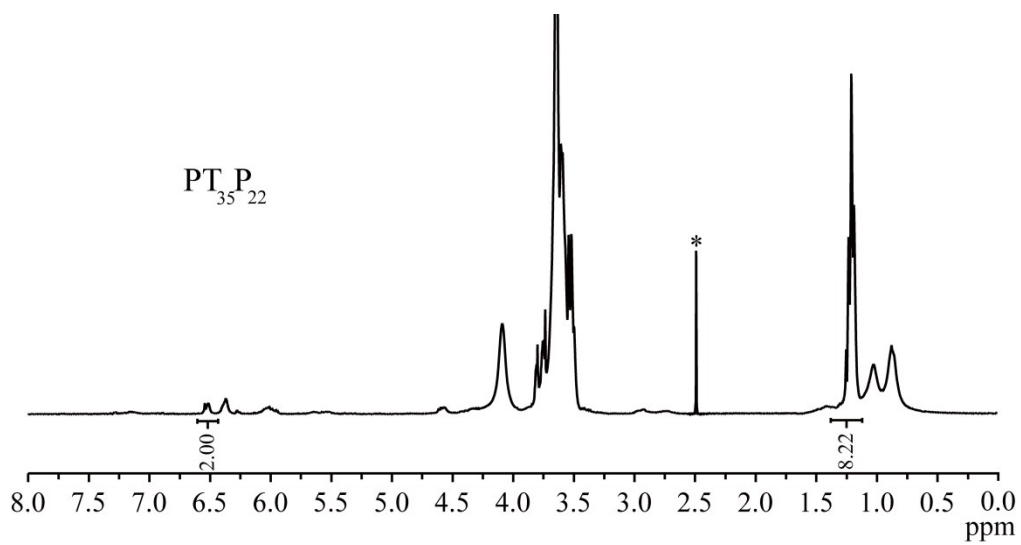

**Figure S7.**  $^1\text{H}$  NMR spectrum of polyprodrug brush  $\text{PT}_{35}\text{P}_{22}$ .

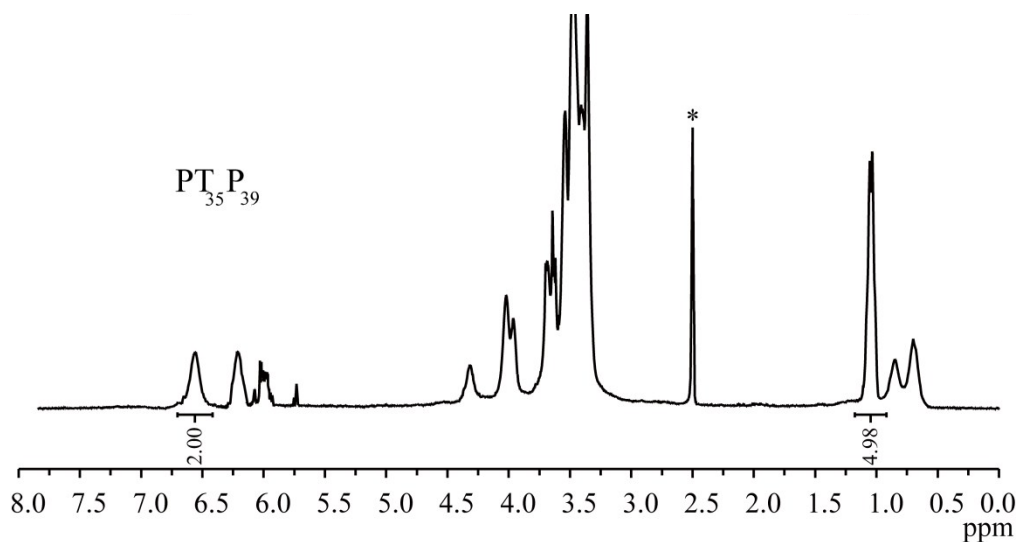

**Figure S8.**  $^1\text{H}$  NMR spectrum of polyprodrug brush  $\text{PT}_{35}\text{P}_{39}$ .

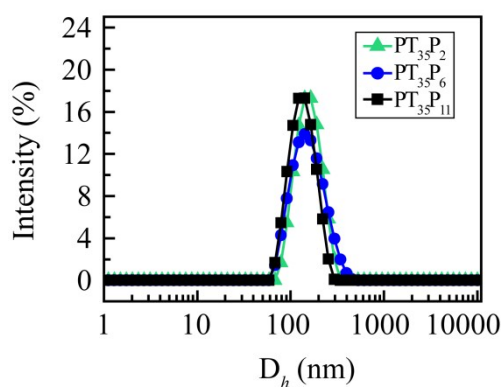

**Figure S9.** DLS curves of polyprodrug brushes in aqueous solution.

**Table S1.** Conditions for and results of a series of polyprodrug brush PTP

| Entries                       | DP <sup>a</sup> | r <sup>b</sup> | Conv. <sup>c</sup><br>(%) | Mn, theor. <sup>d</sup><br>( $\times 10^{-4}$ ) |
|-------------------------------|-----------------|----------------|---------------------------|-------------------------------------------------|
| $\text{PT}_{35}$              | 45 <sup>e</sup> | -              | 45                        | 1.11                                            |
| $\text{PT}_{35}\text{P}_2$    | 3 <sup>f</sup>  | 1:0.1          | 60                        | 1.25                                            |
| $\text{PT}_{35}\text{P}_6$    | 8               | 1:0.2          | 80                        | 1.50                                            |
| $\text{PT}_{35}\text{P}_{11}$ | 14              | 1:0.3          | 56                        | 1.78                                            |
| $\text{PT}_{35}\text{P}_{22}$ | 28              | 1:0.5          | 56                        | 2.46                                            |
| $\text{PT}_{35}\text{P}_{39}$ | 50              | 1:1.0          | 53                        | 3.52                                            |

<sup>a</sup> Degree of polymerization. <sup>b</sup> Block ratios, calculated from DP. <sup>c</sup> Conversion. <sup>d</sup> Theoretical molar mass.
